# Supplementary material for: Cardiovascular outcomes associated with canagliflozin versus other non-gliflozin antidiabetic drugs: population based cohort study
Source: PubMed Central journal article supplement — BMJ. 2018 Mar 8;360:k119. doi: 10.1136/bmj.k119 (PMC5799855; doi:10.1136/bmj.k119), 2018-03-08
Supplement: pate039998.ww1.pdf [file pate039998.ww1.pdf]

**Table S1. Study outcome definition**

| <b>Outcome</b>                                   | <b>Definition</b>                                                                                                                                                                                                                                                                                                                                                                                                            |
|--------------------------------------------------|------------------------------------------------------------------------------------------------------------------------------------------------------------------------------------------------------------------------------------------------------------------------------------------------------------------------------------------------------------------------------------------------------------------------------|
| <b>Heart failure hospitalization</b>             | Inpatient ICD-9 discharge diagnosis: 428.x, 398.91, 402.01, 402.11, 402.91, 404.01, 404.11, 404.91, 404.03, 404.13, 404.93                                                                                                                                                                                                                                                                                                   |
| <b>Myocardial infarction</b>                     | Inpatient ICD-9 discharge diagnosis: 410.xx (acute myocardial infarction) excluding 410.x2 (subsequent episode of care)                                                                                                                                                                                                                                                                                                      |
| <b>Stroke</b>                                    | Inpatient ICD-9 discharge diagnosis:<br>430.xx Subarachnoid hemorrhage (SAH)<br>431.xx Intracerebral hemorrhage (ICH)<br>433.x1 Occlusion and stenosis of precerebral arteries with cerebral infarction<br>434.x1 Occlusion and stenosis of cerebral arteries with cerebral infarction<br>436.x Acute, but ill-defined cerebrovascular events                                                                                |
| <b>Unstable angina requiring hospitalization</b> | Inpatient ICD-9 discharge diagnosis: 411.xx                                                                                                                                                                                                                                                                                                                                                                                  |
| <b>Coronary revascularization</b>                | PTCA: Inpatient CPT-4: 92973, 92982, 92984, 92995, 92996, 92920 – 92921, 92924, 92925, 92937, 92938, 92941, 92943, 92944<br>Inpatient ICD-9 procedure: 00.66, 36.01, 36.02, 36.03, 36.05, 36.09<br><br>Stenting: Inpatient CPT-4: 92980, 92981, 92928 – 92929, 92933 - 92934<br>Inpatient ICD-9 procedure: 36.06, 36.07<br><br>CABG: Inpatient CPT-4: 33510 – 33536, 33545, 33572<br>Inpatient ICD-9 procedure: 36.1x, 36.2x |
