# Supplementary material for: Cardiovascular outcomes associated with canagliflozin versus other non-gliflozin antidiabetic drugs: population based cohort study
Source: PubMed Central journal article supplement — BMJ. 2018 Mar 8;360:k119. doi: 10.1136/bmj.k119 (PMC5799855; doi:10.1136/bmj.k119), 2018-03-08
Supplement: pate039998.ww2.pdf [file pate039998.ww2.pdf]

**Table S2. Baseline characteristics in unadjusted cohorts of canagliflozin- and comparator-exposed patients**

|                                  |                                                |       | Unadjusted Cohort<br>Canagliflozin vs. DPP-4i |                      |             | Unadjusted Cohort<br>Canagliflozin vs. GLP-1 RA |                        |             | Unadjusted Cohort<br>Canagliflozin vs. Sulfonylureas |                              |             |
|----------------------------------|------------------------------------------------|-------|-----------------------------------------------|----------------------|-------------|-------------------------------------------------|------------------------|-------------|------------------------------------------------------|------------------------------|-------------|
| Baseline patient characteristics |                                                |       | Canagliflozin<br>(N=21,431)                   | DPP-4i<br>(N=77,463) | St.<br>Diff | Canagliflozin<br>(N=25,806)                     | GLP-1 RA<br>(N=32,676) | St.<br>Diff | Canagliflozin<br>(N=18,924)                          | Sulfonylureas<br>(N=115,435) | St.<br>Diff |
| <b>Demographics</b>              |                                                |       |                                               |                      |             |                                                 |                        |             |                                                      |                              |             |
| Age                              | Mean (SD)                                      |       | 55.9 (10.4)                                   | 62.3 (12.8)          | -0.55       | 56.8 (10.7)                                     | 56.9 (11.2)            | -0.01       | 55.6 (10.4)                                          | 61.9 (12.8)                  | -0.54       |
| Female                           | N (%)                                          |       | 9,598 (44.8)                                  | 36,555 (47.2)        | -0.01       | 11,019 (42.7)                                   | 17,389 (53.2)          | -0.21       | 8,522 (45.0)                                         | 52,375 (45.4)                | -0.01       |
| Index year                       |                                                |       |                                               |                      |             |                                                 |                        |             |                                                      |                              |             |
|                                  | 2013                                           | N (%) | 3,598 (16.8)                                  | 27,040 (34.9)        | -0.42       | 4,124 (16.0)                                    | 10,903 (33.4)          | -0.41       | 3,308 (17.5)                                         | 39,068 (33.8)                | -0.38       |
|                                  | 2014                                           | N (%) | 8,386 (39.1)                                  | 31,402 (40.5)        | -0.03       | 10,242 (39.7)                                   | 11,989 (36.7)          | 0.06        | 7,504 (39.7)                                         | 44,105 (38.2)                | 0.03        |
|                                  | 2015                                           | N (%) | 9,447 (44.1)                                  | 19,021 (24.6)        | 0.42        | 11,440 (44.3)                                   | 9,784 (29.9)           | 0.30        | 8,112 (42.9)                                         | 32,262 (28.0)                | 0.32        |
| Region                           |                                                |       |                                               |                      |             |                                                 |                        |             |                                                      |                              |             |
|                                  | MidWest                                        | N (%) | 4,766 (22.2)                                  | 14,404 (18.6)        | 0.09        | 5,498 (21.3)                                    | 7,586 (23.2)           | -0.05       | 3,984 (21.1)                                         | 25,085 (21.7)                | -0.02       |
|                                  | NorthEast                                      | N (%) | 1,622 (7.6)                                   | 10,693 (13.8)        | -0.20       | 2,291 (8.9)                                     | 2,924 (9.0)            | 0.00        | 1,580 (8.4)                                          | 12,484 (10.8)                | -0.08       |
|                                  | South                                          | N (%) | 11,923 (55.6)                                 | 37,256 (48.1)        | 0.15        | 14,299 (55.4)                                   | 16,561 (50.7)          | 0.09        | 10,641 (56.2)                                        | 53,881 (46.7)                | 0.19        |
|                                  | West                                           | N (%) | 3,092 (14.4)                                  | 14,671 (18.9)        | -0.12       | 3,682 (14.3)                                    | 5,504 (16.8)           | -0.07       | 2,694 (14.2)                                         | 23,292 (20.2)                | -0.16       |
|                                  | Others                                         | N (%) | 28 (0.1)                                      | 439 (0.6)            | -0.07       | 36 (0.1)                                        | 101 (0.3)              | -0.04       | 25 (0.1)                                             | 693 (0.6)                    | -0.08       |
| <b>Comorbidities</b>             |                                                |       |                                               |                      |             |                                                 |                        |             |                                                      |                              |             |
| Combined Comorbidity Score       | Mean (SD)                                      |       | 0.1 (1.3)                                     | 0.6 (1.9)            | -0.30       | 0.1 (1.3)                                       | 0.4 (1.5)              | -0.18       | 0.1 (1.3)                                            | 0.5 (1.7)                    | -0.26       |
| Number of diagnoses              | Mean (SD)                                      |       | 10.8 (6.9)                                    | 12.0 (8.5)           | -0.15       | 10.6 (6.7)                                      | 12.0 (7.7)             | -0.19       | 10.9 (6.9)                                           | 11.1 (8.2)                   | -0.03       |
| Obesity or overweight            | N (%)                                          |       | 4,831 (22.5)                                  | 12,381 (16.0)        | 0.17        | 5,358 (20.8)                                    | 7,906 (24.2)           | -0.08       | 4,169 (22.0)                                         | 17,121 (14.8)                | 0.19        |
| Smoking                          | N (%)                                          |       | 1,616 (7.5)                                   | 5,128 (6.6)          | 0.04        | 1,813 (7.0)                                     | 2,792 (8.5)            | -0.06       | 1,451 (7.7)                                          | 8,072 (7.0)                  | 0.03        |
| Indicators of diabetes severity  |                                                |       |                                               |                      |             |                                                 |                        |             |                                                      |                              |             |
|                                  | Diabetic nephropathy                           | N (%) | 1,495 (7.0)                                   | 7,698 (9.9)          | -0.11       | 1,750 (6.8)                                     | 2,934 (9.0)            | -0.08       | 1,195 (6.3)                                          | 9,652 (8.4)                  | -0.08       |
|                                  | Diabetic neuropathy                            | N (%) | 3,148 (14.7)                                  | 10,619 (13.7)        | 0.03        | 3,537 (13.7)                                    | 5,317 (16.3)           | -0.07       | 2,674 (14.1)                                         | 13,954 (12.1)                | 0.06        |
|                                  | Diabetic retinopathy                           | N (%) | 1,723 (8.0)                                   | 5,789 (7.5)          | 0.02        | 1,947 (7.5)                                     | 2,805 (8.6)            | -0.04       | 1,480 (7.8)                                          | 6,945 (6.0)                  | 0.07        |
|                                  | Diabetes with peripheral circulatory disorders | N (%) | 636 (3.0)                                     | 3,901 (5.0)          | -0.11       | 784 (3.0)                                       | 1,228 (3.8)            | -0.04       | 548 (2.9)                                            | 4,905 (4.3)                  | -0.07       |
|                                  | Diabetic foot                                  | N (%) | 342 (1.6)                                     | 1,506 (1.9)          | -0.03       | 388 (1.5)                                       | 643 (2.0)              | -0.04       | 287 (1.5)                                            | 2,186 (1.9)                  | -0.03       |
|                                  | Erectile dysfunction                           | N (%) | 728 (3.4)                                     | 2,008 (2.6)          | 0.05        | 917 (3.6)                                       | 905 (2.8)              | 0.04        | 635 (3.4)                                            | 2,845 (2.5)                  | 0.05        |
|                                  | Skin infections                                | N (%) | 1,273 (5.9)                                   | 4,486 (5.8)          | 0.01        | 1,435 (5.6)                                     | 2,086 (6.4)            | -0.03       | 1,100 (5.8)                                          | 6,666 (5.8)                  | 0.00        |
|                                  | Diabetes with unspecified complication         | N (%) | 700 (3.3)                                     | 2,466 (3.2)          | 0.01        | 810 (3.1)                                       | 1,252 (3.8)            | -0.04       | 617 (3.3)                                            | 3,011 (2.6)                  | 0.04        |

| Number of diabetes drugs on the day of cohort entry     | Mean (SD) | 2.3 (1.0)     | 2.2 (0.8)      | 0.20  | 2.5 (1.0)     | 2.3 (1.0)      | 0.17  | 2.2 (0.9)     | 1.8 (0.7)       | 0.48  |
|---------------------------------------------------------|-----------|---------------|----------------|-------|---------------|----------------|-------|---------------|-----------------|-------|
| Diabetes drugs on the day of cohort entry               |           |               |                |       |               |                |       |               |                 |       |
| Metformin                                               | N (%)     | 12,271 (57.3) | 49,335 (63.7)  | -0.13 | 15,530 (60.2) | 17,105 (52.4)  | 0.16  | 10,783 (57.0) | 66,061 (57.2)   | -0.01 |
| DPP-4i                                                  | N (%)     | 0 (0.0)       | 77,463 (100.0) | .     | 6,477 (25.1)  | 4,577 (14.0)   | 0.28  | 3,616 (19.1)  | 12,431 (10.8)   | 0.24  |
| GLP-1 RA                                                | N (%)     | 3,251 (15.2)  | 1,093 (1.4)    | 0.52  | 0 (0.0)       | 32,676 (100.0) | .     | 2,415 (12.8)  | 2,612 (2.3)     | 0.41  |
| Sulfonylureas                                           | N (%)     | 5,688 (26.5)  | 24,156 (31.2)  | -0.10 | 7,751 (30.0)  | 8,636 (26.4)   | 0.08  | 0 (0.0)       | 115,435 (100.0) | .     |
| Insulin                                                 | N (%)     | 5,612 (26.2)  | 9,499 (12.3)   | 0.36  | 5,372 (20.8)  | 8,888 (27.2)   | -0.15 | 5,141 (27.2)  | 10,180 (8.8)    | 0.49  |
| Glitazones                                              | N (%)     | 1,505 (7.0)   | 4,419 (5.7)    | 0.05  | 1,845 (7.2)   | 2,151 (6.6)    | 0.02  | 1,287 (6.8)   | 4,616 (4.0)     | 0.12  |
| Meglitinides                                            | N (%)     | 121 (0.6)     | 556 (0.7)      | -0.02 | 197 (0.8)     | 221 (0.7)      | 0.01  | 161 (0.9)     | 390 (0.3)       | 0.07  |
| Hypertension                                            | N (%)     | 11,256 (52.5) | 42,551 (54.9)  | -0.05 | 13,623 (52.8) | 17,708 (54.2)  | -0.03 | 9,780 (51.7)  | 56,202 (48.7)   | 0.06  |
| Ischemic heart disease                                  | N (%)     | 2,399 (11.2)  | 12,243 (15.8)  | -0.14 | 2,897 (11.2)  | 4,293 (13.1)   | -0.06 | 2,079 (11.0)  | 16,742 (14.5)   | -0.11 |
| History of coronary revascularization                   | N (%)     | 451 (2.1)     | 2,468 (3.2)    | -0.07 | 549 (2.1)     | 848 (2.6)      | -0.03 | 378 (2.0)     | 3,399 (2.9)     | -0.06 |
| Congestive heart failure                                | N (%)     | 639 (3.0)     | 5,352 (6.9)    | -0.18 | 748 (2.9)     | 1,517 (4.6)    | -0.09 | 557 (2.9)     | 7,264 (6.3)     | -0.16 |
| Atrial fibrillation                                     | N (%)     | 585 (2.7)     | 4,245 (5.5)    | -0.14 | 710 (2.8)     | 1,125 (3.4)    | -0.04 | 523 (2.8)     | 6,044 (5.2)     | -0.13 |
| Other cardiac dysrhythmia                               | N (%)     | 625 (2.9)     | 3,890 (5.0)    | -0.11 | 741 (2.9)     | 1,164 (3.6)    | -0.04 | 565 (3.0)     | 5,564 (4.8)     | -0.09 |
| Stroke                                                  | N (%)     | 247 (1.2)     | 2,135 (2.8)    | -0.12 | 303 (1.2)     | 469 (1.4)      | -0.02 | 214 (1.1)     | 2,939 (2.6)     | -0.11 |
| TIA                                                     | N (%)     | 136 (0.6)     | 1,056 (1.4)    | -0.07 | 170 (0.7)     | 281 (0.9)      | -0.02 | 125 (0.7)     | 1,397 (1.2)     | -0.06 |
| Peripheral vascular disease                             | N (%)     | 713 (3.3)     | 4,592 (5.9)    | -0.12 | 907 (3.5)     | 1,405 (4.3)    | -0.04 | 663 (3.5)     | 5,996 (5.2)     | -0.08 |
| Other cardiovascular disease                            | N (%)     | 1,034 (4.8)   | 6,433 (8.3)    | -0.14 | 1,260 (4.9)   | 1,933 (5.9)    | -0.05 | 901 (4.8)     | 8,691 (7.5)     | -0.12 |
| Edema                                                   | N (%)     | 975 (4.6)     | 4,526 (5.8)    | -0.06 | 1,120 (4.3)   | 2,035 (6.2)    | -0.08 | 798 (4.2)     | 5,987 (5.2)     | -0.05 |
| Disorders of fluid electrolyte and acid-base balance    | N (%)     | 742 (3.5)     | 5,309 (6.9)    | -0.15 | 886 (3.4)     | 1,527 (4.7)    | -0.06 | 644 (3.4)     | 7,549 (6.5)     | -0.14 |
| Hypoglycemia                                            | N (%)     | 2,206 (10.3)  | 8,416 (10.9)   | -0.02 | 2,508 (9.7)   | 3,659 (11.2)   | -0.05 | 1,897 (10.0)  | 11,496 (10.0)   | 0.00  |
| Hyperlipidemia                                          | N (%)     | 10,886 (50.8) | 35,714 (46.1)  | 0.09  | 13,161 (51.0) | 16,020 (49.0)  | 0.04  | 9,627 (50.9)  | 44,982 (39.0)   | 0.24  |
| COPD                                                    | N (%)     | 820 (3.8)     | 5,265 (6.8)    | -0.13 | 1,003 (3.9)   | 1,779 (5.4)    | -0.07 | 730 (3.9)     | 8,067 (7.0)     | -0.14 |
| Asthma                                                  | N (%)     | 1,154 (5.4)   | 4,189 (5.4)    | 0.00  | 1,316 (5.1)   | 2,063 (6.3)    | -0.05 | 1,053 (5.6)   | 5,686 (4.9)     | 0.03  |
| Pneumonia                                               | N (%)     | 307 (1.4)     | 2,129 (2.8)    | -0.09 | 353 (1.4)     | 623 (1.9)      | -0.04 | 265 (1.4)     | 3,121 (2.7)     | -0.09 |
| Obstructive sleep apnea                                 | N (%)     | 2,310 (10.8)  | 5,379 (6.9)    | 0.14  | 2,332 (9.0)   | 4,161 (12.7)   | -0.12 | 2,006 (10.6)  | 7,572 (6.6)     | 0.14  |
| Osteoarthritis                                          | N (%)     | 2,020 (9.4)   | 9,178 (11.9)   | -0.08 | 2,425 (9.4)   | 3,789 (11.6)   | -0.07 | 1,826 (9.7)   | 12,429 (10.8)   | -0.04 |
| Other arthritis, arthropathies and musculoskeletal pain | N (%)     | 6,489 (30.3)  | 25,268 (32.6)  | -0.05 | 7,700 (29.8)  | 11,320 (34.6)  | -0.10 | 5,744 (30.4)  | 35,141 (30.4)   | 0.00  |
| Dorsopathies                                            | N (%)     | 3,945 (18.4)  | 14,405 (18.6)  | 0.00  | 4,701 (18.2)  | 7,080 (21.7)   | -0.09 | 3,534 (18.7)  | 21,076 (18.3)   | 0.01  |
| Non-diabetes kidney disease                             | N (%)     | 1,675 (7.8)   | 13,364 (17.3)  | -0.29 | 2,116 (8.2)   | 4,155 (12.7)   | -0.15 | 1,421 (7.5)   | 17,452 (15.1)   | -0.24 |
| Liver disease                                           | N (%)     | 983 (4.6)     | 3,547 (4.6)    | 0.00  | 1,209 (4.7)   | 1,567 (4.8)    | -0.01 | 865 (4.6)     | 4,951 (4.3)     | 0.01  |

|                                                   |       |               |               |       |               |               |       |               |               |       |
|---------------------------------------------------|-------|---------------|---------------|-------|---------------|---------------|-------|---------------|---------------|-------|
| Disorders of thyroid gland                        | N (%) | 3,797 (17.7)  | 12,702 (16.4) | 0.04  | 4,268 (16.5)  | 6,354 (19.5)  | -0.08 | 3,495 (18.5)  | 16,389 (14.2) | 0.12  |
| Depression                                        | N (%) | 2,031 (9.5)   | 7,098 (9.2)   | 0.01  | 2,194 (8.5)   | 3,981 (12.2)  | -0.12 | 1,795 (9.5)   | 10,002 (8.7)  | 0.03  |
| Anxiety or sleep disorder                         | N (%) | 4,262 (19.9)  | 12,130 (15.7) | 0.11  | 4,557 (17.7)  | 7,487 (22.9)  | -0.13 | 3,767 (19.9)  | 17,300 (15.0) | 0.13  |
| Alcohol or drug abuse                             | N (%) | 240 (1.1)     | 1,168 (1.5)   | -0.03 | 301 (1.2)     | 434 (1.3)     | -0.01 | 225 (1.2)     | 1,923 (1.7)   | -0.04 |
| Frailty                                           | N (%) | 292 (1.4)     | 2,121 (2.7)   | -0.10 | 362 (1.4)     | 677 (2.1)     | -0.05 | 269 (1.4)     | 2,854 (2.5)   | -0.08 |
| <b>Medications</b>                                |       |               |               |       |               |               |       |               |               |       |
| No use of any antidiabetic agent in prior 6-month | N (%) | 2,104 (9.8)   | 17,120 (22.1) | -0.34 | 2,142 (8.3)   | 3,954 (12.1)  | -0.13 | 2,104 (11.1)  | 38,566 (33.4) | -0.56 |
| Past use of metformin                             | N (%) | 3,411 (15.9)  | 9,194 (11.9)  | 0.12  | 4,290 (16.6)  | 5,292 (16.2)  | 0.01  | 3,099 (16.4)  | 14,328 (12.4) | 0.11  |
| Past use of DPP-4i                                | N (%) | 0 (0.0)       | 0 (0.0)       | .     | 2,781 (10.8)  | 3,514 (10.8)  | 0.00  | 1,720 (9.1)   | 6,387 (5.5)   | 0.14  |
| Past use of GLP-1 RA                              | N (%) | 1,729 (8.1)   | 1,476 (1.9)   | 0.29  | 0 (0.0)       | 0 (0.0)       | .     | 1,339 (7.1)   | 1,792 (1.6)   | 0.27  |
| Past use of sulfonylureas                         | N (%) | 2,140 (10.0)  | 7,655 (9.9)   | 0.00  | 2,828 (11.0)  | 3,426 (10.5)  | 0.02  | 0 (0.0)       | 0 (0.0)       | .     |
| Past use of insulin                               | N (%) | 2,150 (10.0)  | 3,975 (5.1)   | 0.19  | 2,092 (8.1)   | 3,136 (9.6)   | -0.05 | 1,906 (10.1)  | 5,292 (4.6)   | 0.21  |
| Past use of glitazones                            | N (%) | 635 (3.0)     | 1,858 (2.4)   | 0.03  | 817 (3.2)     | 938 (2.9)     | 0.02  | 559 (3.0)     | 1,635 (1.4)   | 0.10  |
| Past use of meglitinides                          | N (%) | 103 (0.5)     | 296 (0.4)     | 0.02  | 151 (0.6)     | 180 (0.6)     | 0.01  | 108 (0.6)     | 333 (0.3)     | 0.04  |
| Alpha-glucosidase inhibitors                      | N (%) | 107 (0.5)     | 398 (0.5)     | 0.00  | 148 (0.6)     | 164 (0.5)     | 0.01  | 68 (0.4)      | 351 (0.3)     | 0.01  |
| ACE inhibitors                                    | N (%) | 8,996 (42.0)  | 34,110 (44.0) | -0.04 | 11,046 (42.8) | 14,164 (43.4) | -0.01 | 7,461 (39.4)  | 50,949 (44.1) | -0.10 |
| Angiotensin II receptor blockers                  | N (%) | 5,588 (26.1)  | 19,877 (25.7) | 0.01  | 6,778 (26.3)  | 8,628 (26.4)  | 0.00  | 5,068 (26.8)  | 23,850 (20.7) | 0.14  |
| Beta blockers                                     | N (%) | 5,514 (25.7)  | 24,682 (31.9) | -0.14 | 6,681 (25.9)  | 9,621 (29.4)  | -0.08 | 4,650 (24.6)  | 34,454 (29.9) | -0.12 |
| Calcium channel blockers                          | N (%) | 4,162 (19.4)  | 18,966 (24.5) | -0.12 | 5,168 (20.0)  | 6,933 (21.2)  | -0.03 | 3,526 (18.6)  | 25,996 (22.5) | -0.10 |
| Thiazides                                         | N (%) | 6,063 (28.3)  | 22,383 (28.9) | -0.01 | 7,214 (28.0)  | 9,981 (30.6)  | -0.06 | 5,069 (26.8)  | 31,091 (26.9) | 0.00  |
| Loop diuretics                                    | N (%) | 1,689 (7.9)   | 8,715 (11.3)  | -0.11 | 1,871 (7.3)   | 3,751 (11.5)  | -0.15 | 1,378 (7.3)   | 11,906 (10.3) | -0.11 |
| Other diuretics <sup>1</sup>                      | N (%) | 943 (4.4)     | 3,807 (4.9)   | -0.02 | 1,015 (3.9)   | 1,805 (5.5)   | -0.07 | 785 (4.2)     | 5,335 (4.6)   | -0.02 |
| Nitrates                                          | N (%) | 598 (2.8)     | 3,352 (4.3)   | -0.08 | 753 (2.9)     | 1,259 (3.9)   | -0.05 | 509 (2.7)     | 4,655 (4.0)   | -0.07 |
| Other antihypertensives                           | N (%) | 834 (3.9)     | 4,671 (6.0)   | -0.10 | 1,019 (4.0)   | 1,613 (4.9)   | -0.05 | 665 (3.5)     | 6,626 (5.7)   | -0.11 |
| Digoxin                                           | N (%) | 171 (0.8)     | 1,395 (1.8)   | -0.09 | 220 (0.9)     | 366 (1.1)     | -0.03 | 136 (0.7)     | 1,919 (1.7)   | -0.09 |
| Antiarrhythmics                                   | N (%) | 139 (0.7)     | 930 (1.2)     | -0.06 | 159 (0.6)     | 251 (0.8)     | -0.02 | 118 (0.6)     | 1,302 (1.1)   | -0.05 |
| COPD or asthma medications                        | N (%) | 2,544 (11.9)  | 9,706 (12.5)  | -0.02 | 2,926 (11.3)  | 4,683 (14.3)  | -0.09 | 2,320 (12.3)  | 13,186 (11.4) | 0.03  |
| Statins                                           | N (%) | 13,147 (61.4) | 48,044 (62.0) | -0.01 | 16,126 (62.5) | 20,093 (61.5) | 0.02  | 11,526 (60.9) | 65,274 (56.6) | 0.09  |
| Other lipid-lowering drugs                        | N (%) | 2,867 (13.4)  | 8,958 (11.6)  | 0.06  | 3,474 (13.5)  | 4,325 (13.2)  | 0.01  | 2,507 (13.3)  | 11,232 (9.7)  | 0.11  |
| Anticoagulants                                    | N (%) | 690 (3.2)     | 3,945 (5.1)   | -0.09 | 790 (3.1)     | 1,316 (4.0)   | -0.05 | 586 (3.1)     | 5,647 (4.9)   | -0.09 |
| Antiplatelets                                     | N (%) | 1,279 (6.0)   | 6,740 (8.7)   | -0.10 | 1,588 (6.2)   | 2,364 (7.2)   | -0.04 | 1,074 (5.7)   | 8,954 (7.8)   | -0.08 |
| Nonsteroidal anti-inflammatory drugs              | N (%) | 3,954 (18.5)  | 13,516 (17.5) | 0.03  | 4,732 (18.3)  | 6,376 (19.5)  | -0.03 | 3,494 (18.5)  | 18,449 (16.0) | 0.07  |
| Opioids                                           | N (%) | 5,914 (27.6)  | 20,676 (26.7) | 0.02  | 6,816 (26.4)  | 10,422 (31.9) | -0.12 | 5,161 (27.3)  | 30,825 (26.7) | 0.01  |
| Oral steroids                                     | N (%) | 3,215 (15.0)  | 11,892 (15.4) | -0.01 | 3,680 (14.3)  | 5,232 (16.0)  | -0.05 | 2,871 (15.2)  | 17,517 (15.2) | 0.00  |

|                                              |           |              |               |       |               |               |       |              |               |       |
|----------------------------------------------|-----------|--------------|---------------|-------|---------------|---------------|-------|--------------|---------------|-------|
| Antidepressants                              | N (%)     | 5,255 (24.5) | 16,601 (21.4) | 0.07  | 5,737 (22.2)  | 9,815 (30.0)  | -0.18 | 4,715 (24.9) | 23,438 (20.3) | 0.11  |
| Anticonvulsants                              | N (%)     | 2,952 (13.8) | 10,319 (13.3) | 0.01  | 3,371 (13.1)  | 5,538 (17.0)  | -0.11 | 2,596 (13.7) | 14,108 (12.2) | 0.04  |
| Other psychotropic medications               | N (%)     | 3,688 (17.2) | 14,024 (18.1) | -0.02 | 4,185 (16.2)  | 6,724 (20.6)  | -0.11 | 3,317 (17.5) | 19,800 (17.2) | 0.01  |
| <b>Measures of healthcare utilization</b>    |           |              |               |       |               |               |       |              |               |       |
| Any hospitalization within prior 30 days     | N (%)     | 206 (1.0)    | 2,965 (3.8)   | -0.19 | 239 (0.9)     | 394 (1.2)     | -0.03 | 179 (1.0)    | 5,307 (4.6)   | -0.22 |
| Any hospitalization during prior 31-183 days | N (%)     | 792 (3.7)    | 5,007 (6.5)   | -0.13 | 942 (3.7)     | 1,568 (4.8)   | -0.06 | 679 (3.6)    | 6,804 (5.9)   | -0.11 |
| N hospital days                              | Mean (SD) | 0.2 (1.5)    | 0.7 (3.7)     | -0.16 | 0.2 (1.6)     | 0.3 (2.1)     | -0.04 | 0.2 (1.6)    | 0.6 (3.4)     | -0.16 |
| Number of emergency department visits        | Mean (SD) | 0.2 (0.7)    | 0.3 (0.8)     | -0.12 | 0.2 (0.6)     | 0.2 (0.7)     | -0.10 | 0.2 (0.7)    | 0.3 (0.8)     | -0.13 |
| Number of any physician visits               | Mean (SD) | 4.5 (3.5)    | 4.4 (3.6)     | 0.03  | 4.4 (3.3)     | 5.0 (3.9)     | -0.18 | 4.5 (3.4)    | 3.9 (3.4)     | -0.19 |
| Visit to endocrinologist                     | N (%)     | 3,738 (17.4) | 3,736 (4.8)   | 0.41  | 3,389 (13.1)  | 4,718 (14.4)  | -0.04 | 3,178 (16.8) | 4,083 (3.5)   | 0.45  |
| Visit to cardiologist                        | N (%)     | 1,799 (8.4)  | 4,835 (6.2)   | 0.08  | 2,021 (7.8)   | 2,693 (8.2)   | -0.02 | 1,604 (8.5)  | 6,841 (5.9)   | 0.10  |
| Number of electrocardiograms received        | Mean (SD) | 0.3 (0.7)    | 0.5 (1.0)     | -0.18 | 0.3 (0.7)     | 0.4 (0.8)     | -0.07 | 0.3 (0.7)    | 0.4 (1.0)     | -0.13 |
| Number of distinct prescriptions             | Mean (SD) | 10.0 (5.2)   | 9.6 (5.2)     | 0.07  | 9.7 (5.0)     | 10.9 (5.5)    | -0.23 | 9.8 (5.3)    | 8.7 (4.9)     | 0.21  |
| Number of preventive services received       | Mean (SD) | 0.6 (0.8)    | 0.6 (0.8)     | 0.01  | 0.6 (0.8)     | 0.6 (0.8)     | 0.03  | 0.6 (0.8)    | 0.5 (0.7)     | 0.09  |
| Number of hemoglobin or HbA1c tests ordered  | Mean (SD) | 1.3 (0.8)    | 1.2 (0.8)     | 0.18  | 1.3 (0.8)     | 1.2 (0.9)     | 0.07  | 1.3 (0.8)    | 1.0 (0.8)     | 0.38  |
| Number of creatinine tests ordered           | Mean (SD) | 0.0 (0.2)    | 0.0 (0.3)     | -0.04 | 0.0 (0.2)     | 0.0 (0.3)     | -0.04 | 0.0 (0.2)    | 0.0 (0.3)     | -0.04 |
| Number of BUN tests ordered                  | Mean (SD) | 1.0 (1.0)    | 1.1 (1.3)     | -0.12 | 1.0 (1.0)     | 1.0 (1.2)     | -0.04 | 1.0 (1.0)    | 1.0 (1.2)     | 0.03  |
| Number of lipid tests ordered                | Mean (SD) | 1.0 (0.8)    | 0.9 (0.8)     | 0.08  | 1.0 (0.8)     | 0.9 (0.8)     | 0.09  | 1.0 (0.8)    | 0.8 (0.8)     | 0.25  |
| <b>Laboratory tests</b>                      |           |              |               |       |               |               |       |              |               |       |
| Patients with HbA1c available                | N (%)     | 7,882 (36.8) | 27,856 (36.0) | 0.02  | 9,952 (38.6)  | 10,995 (33.7) | 0.10  | 7,037 (37.2) | 35,780 (31.0) | 0.13  |
| HbA1c, %                                     | Mean (SD) | 8.8 (1.8)    | 8.5 (1.9)     | 0.16  | 8.8 (1.8)     | 8.8 (1.9)     | 0.04  | 8.7 (1.9)    | 8.6 (2.0)     | 0.08  |
| Patients with creatinine available           | N (%)     | 8,492 (39.6) | 29,965 (38.7) | 0.02  | 10,564 (40.9) | 12,044 (36.9) | 0.08  | 7,650 (40.4) | 38,603 (33.4) | 0.15  |
| Creatinine, mg/dL                            | Mean (SD) | 0.9 (0.2)    | 1.0 (0.3)     | -0.33 | 0.9 (0.2)     | 1.0 (0.3)     | -0.16 | 0.9 (0.2)    | 1.0 (0.4)     | -0.32 |
| Patients with eGFR available                 | N (%)     | 8,492 (39.6) | 29,965 (38.7) | 0.02  | 10,564 (40.9) | 12,044 (36.9) | 0.08  | 7,650 (40.4) | 38,603 (33.4) | 0.15  |
| eGFR, mL/min/1.73m <sup>2</sup>              | Mean (SD) | 100.8 (18.0) | 90.4 (24.5)   | 0.49  | 100.2 (18.6)  | 95.2 (22.5)   | 0.24  | 101.3 (17.9) | 91.2 (24.2)   | 0.48  |
| Patients with BUN available                  | N (%)     | 8,396 (39.2) | 29,486 (38.1) | 0.02  | 10,440 (40.5) | 11,873 (36.3) | 0.08  | 7,572 (40.0) | 37,973 (32.9) | 0.15  |
| BUN, mg/dL                                   | Mean (SD) | 15.7 (5.6)   | 17.8 (8.2)    | -0.30 | 15.8 (5.7)    | 16.9 (7.3)    | -0.17 | 15.6 (5.5)   | 17.4 (7.9)    | -0.27 |
| Patients with LDL available                  | N (%)     | 6,776 (31.6) | 24,050 (31.1) | 0.01  | 8,560 (33.2)  | 9,366 (28.7)  | 0.10  | 6,096 (32.2) | 30,642 (26.5) | 0.12  |
| LDL, mg/dL                                   | Mean (SD) | 93.8 (36.3)  | 95.3 (36.4)   | -0.04 | 93.7 (35.6)   | 94.7 (35.9)   | -0.03 | 93.9 (36.2)  | 98.2 (37.5)   | -0.12 |

DPP-4i: DPP-4 inhibitors; GLP-1 RA: GLP-1 receptor agonists; St. Diff: Standardized difference; SD: standard deviation; TIA: transient ischemic attack; COPD: Chronic Obstructive Pulmonary Disease; ACE: angiotensin converting enzyme; HbA1c: Hemoglobin A1c; BUN: blood urea nitrogen; eGFR: estimated glomerular filtration rate; LDL: low-density lipoprotein

<sup>1</sup> Other diuretics included eplerenone, spironolactone, amiloride, and triamterene
