# Supplementary material for: Cardiovascular outcomes associated with canagliflozin versus other non-gliflozin antidiabetic drugs: population based cohort study
Source: PubMed Central journal article supplement — BMJ. 2018 Mar 8;360:k119. doi: 10.1136/bmj.k119 (PMC5799855; doi:10.1136/bmj.k119), 2018-03-08
Supplement: pate039998.ww3.pdf [file pate039998.ww3.pdf]

**Table S3. Definition of history of heart failure and cardiovascular disease**

| <b>Disease history</b>                   | <b>Specific condition</b>          | <b>Definition</b>                                                                                                                                                                                                                                                                                                                                                                                                                                                                                                                                                                                                                                                                                                                                                                                                                                                                                                                                                                                                                                                                                |
|------------------------------------------|------------------------------------|--------------------------------------------------------------------------------------------------------------------------------------------------------------------------------------------------------------------------------------------------------------------------------------------------------------------------------------------------------------------------------------------------------------------------------------------------------------------------------------------------------------------------------------------------------------------------------------------------------------------------------------------------------------------------------------------------------------------------------------------------------------------------------------------------------------------------------------------------------------------------------------------------------------------------------------------------------------------------------------------------------------------------------------------------------------------------------------------------|
| <b>History of heart failure</b>          | <b>Heart failure</b>               | ICD-9 diagnosis: 428.x, 398.91, 402.01, 402.11, 402.91, 404.01, 404.11, 404.91, 404.03, 404.13, 404.93                                                                                                                                                                                                                                                                                                                                                                                                                                                                                                                                                                                                                                                                                                                                                                                                                                                                                                                                                                                           |
|                                          | <b>Use of loop diuretics</b>       | Use of loop diuretics in the 6-month period prior to treatment initiation                                                                                                                                                                                                                                                                                                                                                                                                                                                                                                                                                                                                                                                                                                                                                                                                                                                                                                                                                                                                                        |
| <b>History of cardiovascular disease</b> | <b>Coronary heart disease</b>      | ICD-9 diagnosis: 410-414xx, V45.81, V45.82<br>ICD9 procedure: 00.66, 36.01, 36.02, 36.03, 36.04, 36.05, 36.06, 36.07, 36.09, 36.1x, 36.2x<br>CPT4 code: 33510 – 33536, 33545, 33572, 92973, 92980, 92981, 92982, 92984, 92995, 92996                                                                                                                                                                                                                                                                                                                                                                                                                                                                                                                                                                                                                                                                                                                                                                                                                                                             |
|                                          | <b>Cerebrovascular disease</b>     | ICD-9 diagnosis: 430.xx, 431.xx, 433.xx, 434.xx, 435.xx, 436.xx, 438.xx, V12.54<br>ICD9 procedure: 38.11, 38.12, 39.28                                                                                                                                                                                                                                                                                                                                                                                                                                                                                                                                                                                                                                                                                                                                                                                                                                                                                                                                                                           |
|                                          | <b>Peripheral vascular disease</b> | ICD-9 diagnosis: 440.20 - 440.24, 440.29 – 440.32, 440.3x, 443.9x<br><br>Lower-extremity endarterectomy, stenting, angioplasty, or atherectomy:<br>ICD9 procedure: 38.18, 38.19<br>CPT4 code: 35454, 35456, 35459, 35470, 35473, 35474, 35482, 35483, 35485, 35492, 35493, 35495, 37207, 37208, 37220-27235<br><br>Lower-extremity bypass:<br>ICD9 procedure: 39.25, 39.29<br>CPT4 code: 35351, 35355, 35361, 35363, 35371, 35372, 35521, 35533, 35541, 35546, 35548, 35549, 35551, 35556, 35558, 35563, 35565, 35566, 35571, 35621, 35623, 35641, 35646, 35647, 35651, 35654, 35656, 35661, 35663, 35666, 35671, 35570, 35582, 35583, 35585, 35587, 35637, 35638, 35681, 35682, 35683<br><br>Lower-extremity amputation:<br>ICD9 procedure: 84.10-84.17<br>CPT4 code: 27590, 27591, 27592, 27880, 27881, 27882, 27884, 27886, 27888, 27889, 27295, 27598, 28800, 28805, 28810, 28820, 28825<br>ICD9: V49.7x (NOT V49.76 or V49.77)<br><br>Other peripheral vascular surgery:<br>ICD9 procedure: 38.08, 38.09, 38.38, 38.39, 38.48, 38.49, 39.5x, 39.9x<br>CPT4 code: 35256, 35286, 35381, 35879 |
|                                          |                                    | <b>Heart failure</b>                                                                                                                                                                                                                                                                                                                                                                                                                                                                                                                                                                                                                                                                                                                                                                                                                                                                                                                                                                                                                                                                             |
