# Supplementary material for: Cardiovascular outcomes associated with canagliflozin versus other non-gliflozin antidiabetic drugs: population based cohort study
Source: PubMed Central journal article supplement — BMJ. 2018 Mar 8;360:k119. doi: 10.1136/bmj.k119 (PMC5799855; doi:10.1136/bmj.k119), 2018-03-08
Supplement: pate039998.ww4.pdf [file pate039998.ww4.pdf]

**Table S4. Risk of heart failure hospitalization and composite cardiovascular endpoint associated with canagliflozin versus comparators in unadjusted analyses**

|                                                      | Cohort<br>Canagliflozin vs. DPP-4i |               | Cohort<br>Canagliflozin vs. GLP-1 RA |                 | Cohort<br>Canagliflozin vs. Sulfonylureas |                      |
|------------------------------------------------------|------------------------------------|---------------|--------------------------------------|-----------------|-------------------------------------------|----------------------|
| <b>Analysis:</b>                                     | <b>Canagliflozin</b>               | <b>DPP-4i</b> | <b>Canagliflozin</b>                 | <b>GLP-1 RA</b> | <b>Canagliflozin</b>                      | <b>Sulfonylureas</b> |
| No. Patients                                         | 21,431                             | 77,463        | 25,806                               | 32,676          | 18,924                                    | 115,435              |
| Mean follow-up in years (SD)                         | 0.6 (0.5)                          | 0.7 (0.6)     | 0.6 (0.5)                            | 0.7 (0.6)       | 0.6 (0.5)                                 | 0.8 (0.6)            |
| <b>Heart failure hospitalization</b>                 |                                    |               |                                      |                 |                                           |                      |
| No. Events (IR per 1000 person-years)                | 105 (8.2)                          | 1470 (27.5)   | 105 (6.8)                            | 332 (15.6)      | 81 (7.0)                                  | 2433 (27.8)          |
| Hazard Ratio (95% CI)                                | 0.29 (0.24-0.35)                   | Ref.          | 0.44 (0.35-0.54)                     | Ref.            | 0.24 (0.19-0.30)                          | Ref.                 |
| <b>Composite cardiovascular endpoint<sup>1</sup></b> |                                    |               |                                      |                 |                                           |                      |
| No. Events (IR per 1000 person-years)                | 111 (8.7)                          | 817 (15.2)    | 136 (8.9)                            | 187 (8.8)       | 100 (8.6)                                 | 1501 (17.0)          |
| Hazard Ratio (95% CI)                                | 0.57 (0.46-0.69)                   | Ref.          | 1.00 (0.80-1.24)                     | Ref.            | 0.49 (0.40-0.61)                          | Ref.                 |

DPP-4i: DPP-4 inhibitors; GLP-1 RA: GLP-1 receptor agonists; SD: standard deviation; IR: incidence rate; CI: confidence intervals; Ref.: reference; PS: propensity score

<sup>1</sup>Composite cardiovascular outcome was defined as a hospitalization for myocardial infarction or stroke
