# Supplementary material for: Cardiovascular outcomes associated with canagliflozin versus other non-gliflozin antidiabetic drugs: population based cohort study
Source: PubMed Central journal article supplement — BMJ. 2018 Mar 8;360:k119. doi: 10.1136/bmj.k119 (PMC5799855; doi:10.1136/bmj.k119), 2018-03-08
Supplement: pate039998.ww5.pdf [file pate039998.ww5.pdf]

**Table S5. Baseline characteristics in propensity-score matched cohorts of canagliflozin- and comparator-exposed patients**

|                                  |                                                |       | 1:1 PS-matched Cohort<br>Canagliflozin vs. DPP-4i |                      |             | 1:1 PS-matched Cohort<br>Canagliflozin vs. GLP-1 RA |                        |             | 1:1 PS-matched Cohort<br>Canagliflozin vs. Sulfonylureas |                             |             |
|----------------------------------|------------------------------------------------|-------|---------------------------------------------------|----------------------|-------------|-----------------------------------------------------|------------------------|-------------|----------------------------------------------------------|-----------------------------|-------------|
| Baseline patient characteristics |                                                |       | Canagliflozin<br>(N=17,667)                       | DPP-4i<br>(N=17,667) | St.<br>Diff | Canagliflozin<br>(N=20,539)                         | GLP-1 RA<br>(N=20,539) | St.<br>Diff | Canagliflozin<br>(N=17,354)                              | Sulfonylureas<br>(N=17,354) | St.<br>Diff |
| <b>Demographics</b>              |                                                |       |                                                   |                      |             |                                                     |                        |             |                                                          |                             |             |
| Age                              | Mean (SD)                                      |       | 56.5 (10.6)                                       | 56.5 (10.7)          | 0.00        | 56.8 (10.9)                                         | 56.7 (10.8)            | 0.01        | 55.9 (10.5)                                              | 55.8 (10.5)                 | 0.01        |
| Female                           | N (%)                                          |       | 7,931 (44.9)                                      | 7,954 (45.0)         | 0.00        | 9,716 (47.3)                                        | 9,702 (47.2)           | 0.00        | 7,809 (45.0)                                             | 7,835 (45.2)                | 0.00        |
| Index year                       |                                                |       |                                                   |                      |             |                                                     |                        |             |                                                          |                             |             |
|                                  | 2013                                           | N (%) | 2,906 (16.5)                                      | 2,906 (16.5)         | 0.00        | 3,999 (19.5)                                        | 3,999 (19.5)           | 0.00        | 3,099 (17.9)                                             | 3,099 (17.9)                | 0.00        |
|                                  | 2014                                           | N (%) | 6,797 (38.5)                                      | 6,797 (38.5)         | 0.00        | 8,380 (40.8)                                        | 8,380 (40.8)           | 0.00        | 6,804 (39.2)                                             | 6,804 (39.2)                | 0.00        |
|                                  | 2015                                           | N (%) | 7,964 (45.1)                                      | 7,964 (45.1)         | 0.00        | 8,160 (39.7)                                        | 8,160 (39.7)           | 0.00        | 7,451 (42.9)                                             | 7,451 (42.9)                | 0.00        |
| Region                           |                                                |       |                                                   |                      |             |                                                     |                        |             |                                                          |                             |             |
|                                  | MidWest                                        | N (%) | 3,885 (22.0)                                      | 3,876 (21.9)         | 0.00        | 4,601 (22.4)                                        | 4,582 (22.3)           | 0.00        | 3,701 (21.3)                                             | 3,637 (21.0)                | 0.01        |
|                                  | NorthEast                                      | N (%) | 1,452 (8.2)                                       | 1,380 (7.8)          | 0.02        | 1,809 (8.8)                                         | 1,841 (9.0)            | -0.01       | 1,493 (8.6)                                              | 1,511 (8.7)                 | 0.00        |
|                                  | South                                          | N (%) | 9,697 (54.9)                                      | 9,745 (55.2)         | -0.01       | 10,978 (53.5)                                       | 10,985 (53.5)          | 0.00        | 9,604 (55.3)                                             | 9,644 (55.6)                | 0.00        |
|                                  | West                                           | N (%) | 2,607 (14.8)                                      | 2,639 (14.9)         | -0.01       | 3,116 (15.2)                                        | 3,095 (15.1)           | 0.00        | 2,531 (14.6)                                             | 2,537 (14.6)                | 0.00        |
|                                  | Others                                         | N (%) | 26 (0.2)                                          | 27 (0.2)             | 0.00        | 35 (0.2)                                            | 36 (0.2)               | 0.00        | 25 (0.1)                                                 | 25 (0.1)                    | 0.00        |
| <b>Comorbidities</b>             |                                                |       |                                                   |                      |             |                                                     |                        |             |                                                          |                             |             |
| Combined Comorbidity Score       | Mean (SD)                                      |       | 0.1 (1.3)                                         | 0.2 (1.4)            | 0.02        | 0.2 (1.4)                                           | 0.2 (1.4)              | -0.01       | 0.1 (1.3)                                                | 0.1 (1.4)                   | -0.01       |
| Number of diagnoses              | Mean (SD)                                      |       | 10.8 (6.9)                                        | 10.9 (7.2)           | -0.01       | 11.0 (7.0)                                          | 11.1 (7.1)             | -0.01       | 10.8 (6.9)                                               | 10.8 (7.0)                  | 0.00        |
| Obesity or overweight            | N (%)                                          |       | 3,768 (21.3)                                      | 3,805 (21.5)         | -0.01       | 4,572 (22.3)                                        | 4,582 (22.3)           | 0.00        | 3,673 (21.2)                                             | 3,677 (21.2)                | 0.00        |
| Smoking                          | N (%)                                          |       | 1,333 (7.6)                                       | 1,304 (7.4)          | 0.01        | 1,553 (7.6)                                         | 1,523 (7.4)            | 0.01        | 1,321 (7.6)                                              | 1,297 (7.5)                 | 0.01        |
| Indicators of diabetes severity  |                                                |       |                                                   |                      |             |                                                     |                        |             |                                                          |                             |             |
|                                  | Diabetic nephropathy                           | N (%) | 1,217 (6.9)                                       | 1,216 (6.9)          | 0.00        | 1,530 (7.5)                                         | 1,524 (7.4)            | 0.00        | 1,103 (6.4)                                              | 1,104 (6.4)                 | 0.00        |
|                                  | Diabetic neuropathy                            | N (%) | 2,436 (13.8)                                      | 2,412 (13.7)         | 0.00        | 3,003 (14.6)                                        | 3,058 (14.9)           | -0.01       | 2,352 (13.6)                                             | 2,323 (13.4)                | 0.00        |
|                                  | Diabetic retinopathy                           | N (%) | 1,279 (7.2)                                       | 1,260 (7.1)          | 0.00        | 1,606 (7.8)                                         | 1,632 (8.0)            | 0.00        | 1,269 (7.3)                                              | 1,285 (7.4)                 | 0.00        |
|                                  | Diabetes with peripheral circulatory disorders | N (%) | 528 (3.0)                                         | 530 (3.0)            | 0.00        | 678 (3.3)                                           | 693 (3.4)              | 0.00        | 511 (2.9)                                                | 524 (3.0)                   | 0.00        |
|                                  | Diabetic foot                                  | N (%) | 274 (1.6)                                         | 290 (1.6)            | -0.01       | 341 (1.7)                                           | 355 (1.7)              | -0.01       | 257 (1.5)                                                | 256 (1.5)                   | 0.00        |
|                                  | Erectile dysfunction                           | N (%) | 573 (3.2)                                         | 575 (3.3)            | 0.00        | 641 (3.1)                                           | 645 (3.1)              | 0.00        | 564 (3.3)                                                | 544 (3.1)                   | 0.01        |
|                                  | Skin infections                                | N (%) | 1,050 (5.9)                                       | 1,039 (5.9)          | 0.00        | 1,220 (5.9)                                         | 1,189 (5.8)            | 0.01        | 997 (5.8)                                                | 1,006 (5.8)                 | 0.00        |
|                                  | Diabetes with unspecified complication         | N (%) | 556 (3.2)                                         | 544 (3.1)            | 0.00        | 703 (3.4)                                           | 723 (3.5)              | -0.01       | 533 (3.1)                                                | 531 (3.1)                   | 0.00        |

| Number of diabetes drugs on the day of cohort entry     | Mean (SD) | 2.2 (0.9)     | 2.2 (0.9)      | 0.00  | 2.4 (1.0)     | 2.4 (1.0)      | 0.00  | 2.2 (0.9)    | 2.2 (0.9)      | 0.01  |
|---------------------------------------------------------|-----------|---------------|----------------|-------|---------------|----------------|-------|--------------|----------------|-------|
| Diabetes drugs on the day of cohort entry               |           |               |                |       |               |                |       |              |                |       |
| Metformin                                               | N (%)     | 10,429 (59.0) | 10,508 (59.5)  | -0.01 | 11,655 (56.8) | 11,647 (56.7)  | 0.00  | 9,969 (57.4) | 9,956 (57.4)   | 0.00  |
| DPP-4i                                                  | N (%)     | 0 (0.0)       | 17,667 (100.0) | .     | 3,875 (18.9)  | 3,884 (18.9)   | 0.00  | 3,342 (19.3) | 3,508 (20.2)   | -0.02 |
| GLP-1 RA                                                | N (%)     | 1,047 (5.9)   | 1,008 (5.7)    | 0.01  | 0 (0.0)       | 20,539 (100.0) | .     | 1,760 (10.1) | 1,634 (9.4)    | 0.02  |
| Sulfonylureas                                           | N (%)     | 4,862 (27.5)  | 4,945 (28.0)   | -0.01 | 5,846 (28.5)  | 5,810 (28.3)   | 0.00  | 0 (0.0)      | 17,354 (100.0) | .     |
| Insulin                                                 | N (%)     | 3,817 (21.6)  | 3,724 (21.1)   | 0.01  | 4,863 (23.7)  | 4,938 (24.0)   | -0.01 | 4,102 (23.6) | 3,913 (22.6)   | 0.03  |
| Glitazones                                              | N (%)     | 1,149 (6.5)   | 1,220 (6.9)    | -0.02 | 1,431 (7.0)   | 1,421 (6.9)    | 0.00  | 1,123 (6.5)  | 1,126 (6.5)    | 0.00  |
| Meglitinides                                            | N (%)     | 99 (0.6)      | 100 (0.6)      | 0.00  | 149 (0.7)     | 152 (0.7)      | 0.00  | 131 (0.8)    | 128 (0.7)      | 0.00  |
| Hypertension                                            | N (%)     | 9,170 (51.9)  | 9,164 (51.9)   | 0.00  | 10,910 (53.1) | 10,994 (53.5)  | -0.01 | 8,821 (50.8) | 8,873 (51.1)   | -0.01 |
| Ischemic heart disease                                  | N (%)     | 2,018 (11.4)  | 1,975 (11.2)   | 0.01  | 2,431 (11.8)  | 2,454 (12.0)   | 0.00  | 1,895 (10.9) | 1,906 (11.0)   | 0.00  |
| History of coronary revascularization                   | N (%)     | 385 (2.2)     | 391 (2.2)      | 0.00  | 465 (2.3)     | 491 (2.4)      | -0.01 | 351 (2.0)    | 340 (2.0)      | 0.00  |
| Congestive heart failure                                | N (%)     | 563 (3.2)     | 594 (3.4)      | -0.01 | 694 (3.4)     | 709 (3.5)      | 0.00  | 517 (3.0)    | 530 (3.1)      | 0.00  |
| Atrial fibrillation                                     | N (%)     | 507 (2.9)     | 517 (2.9)      | 0.00  | 622 (3.0)     | 613 (3.0)      | 0.00  | 500 (2.9)    | 488 (2.8)      | 0.00  |
| Other cardiac dysrhythmia                               | N (%)     | 541 (3.1)     | 567 (3.2)      | -0.01 | 656 (3.2)     | 659 (3.2)      | 0.00  | 524 (3.0)    | 566 (3.3)      | -0.01 |
| Stroke                                                  | N (%)     | 222 (1.3)     | 227 (1.3)      | 0.00  | 251 (1.2)     | 272 (1.3)      | -0.01 | 202 (1.2)    | 195 (1.1)      | 0.00  |
| TIA                                                     | N (%)     | 121 (0.7)     | 119 (0.7)      | 0.00  | 153 (0.7)     | 155 (0.8)      | 0.00  | 120 (0.7)    | 126 (0.7)      | 0.00  |
| Peripheral vascular disease                             | N (%)     | 619 (3.5)     | 623 (3.5)      | 0.00  | 762 (3.7)     | 786 (3.8)      | -0.01 | 624 (3.6)    | 595 (3.4)      | 0.01  |
| Other cardiovascular disease                            | N (%)     | 883 (5.0)     | 922 (5.2)      | -0.01 | 1,068 (5.2)   | 1,076 (5.2)    | 0.00  | 841 (4.9)    | 840 (4.8)      | 0.00  |
| Edema                                                   | N (%)     | 818 (4.6)     | 840 (4.8)      | -0.01 | 1,024 (5.0)   | 1,030 (5.0)    | 0.00  | 720 (4.2)    | 738 (4.3)      | 0.00  |
| Disorders of fluid electrolyte and acid-base balance    | N (%)     | 652 (3.7)     | 656 (3.7)      | 0.00  | 763 (3.7)     | 820 (4.0)      | -0.01 | 612 (3.5)    | 590 (3.4)      | 0.01  |
| Hypoglycemia                                            | N (%)     | 1,781 (10.1)  | 1,814 (10.3)   | -0.01 | 2,094 (10.2)  | 2,117 (10.3)   | 0.00  | 1,707 (9.8)  | 1,726 (10.0)   | 0.00  |
| Hyperlipidemia                                          | N (%)     | 8,600 (48.7)  | 8,556 (48.4)   | 0.01  | 10,246 (49.9) | 10,342 (50.4)  | -0.01 | 8,544 (49.2) | 8,532 (49.2)   | 0.00  |
| COPD                                                    | N (%)     | 742 (4.2)     | 764 (4.3)      | -0.01 | 888 (4.3)     | 894 (4.4)      | 0.00  | 706 (4.1)    | 667 (3.8)      | 0.01  |
| Asthma                                                  | N (%)     | 957 (5.4)     | 960 (5.4)      | 0.00  | 1,123 (5.5)   | 1,125 (5.5)    | 0.00  | 939 (5.4)    | 919 (5.3)      | 0.00  |
| Pneumonia                                               | N (%)     | 261 (1.5)     | 288 (1.6)      | -0.01 | 320 (1.6)     | 314 (1.5)      | 0.00  | 250 (1.4)    | 237 (1.4)      | 0.01  |
| Obstructive sleep apnea                                 | N (%)     | 1,720 (9.7)   | 1,667 (9.4)    | 0.01  | 2,113 (10.3)  | 2,102 (10.2)   | 0.00  | 1,702 (9.8)  | 1,682 (9.7)    | 0.00  |
| Osteoarthritis                                          | N (%)     | 1,707 (9.7)   | 1,688 (9.6)    | 0.00  | 2,079 (10.1)  | 2,093 (10.2)   | 0.00  | 1,680 (9.7)  | 1,617 (9.3)    | 0.01  |
| Other arthritis, arthropathies and musculoskeletal pain | N (%)     | 5,367 (30.4)  | 5,351 (30.3)   | 0.00  | 6,460 (31.5)  | 6,474 (31.5)   | 0.00  | 5,242 (30.2) | 5,283 (30.4)   | -0.01 |
| Dorsopathies                                            | N (%)     | 3,267 (18.5)  | 3,263 (18.5)   | 0.00  | 3,997 (19.5)  | 3,999 (19.5)   | 0.00  | 3,240 (18.7) | 3,245 (18.7)   | 0.00  |
| Non-diabetes kidney disease                             | N (%)     | 1,484 (8.4)   | 1,487 (8.4)    | 0.00  | 1,922 (9.4)   | 1,921 (9.4)    | 0.00  | 1,347 (7.8)  | 1,348 (7.8)    | 0.00  |
| Liver disease                                           | N (%)     | 816 (4.6)     | 838 (4.7)      | -0.01 | 961 (4.7)     | 1,000 (4.9)    | -0.01 | 789 (4.6)    | 788 (4.5)      | 0.00  |

|                                                   |       |               |               |       |               |               |       |               |               |       |
|---------------------------------------------------|-------|---------------|---------------|-------|---------------|---------------|-------|---------------|---------------|-------|
| Disorders of thyroid gland                        | N (%) | 2,938 (16.6)  | 2,897 (16.4)  | 0.01  | 3,641 (17.7)  | 3,689 (18.0)  | -0.01 | 3,093 (17.8)  | 3,073 (17.7)  | 0.00  |
| Depression                                        | N (%) | 1,673 (9.5)   | 1,635 (9.3)   | 0.01  | 2,006 (9.8)   | 2,066 (10.1)  | -0.01 | 1,617 (9.3)   | 1,561 (9.0)   | 0.01  |
| Anxiety or sleep disorder                         | N (%) | 3,369 (19.1)  | 3,352 (19.0)  | 0.00  | 4,002 (19.5)  | 4,038 (19.7)  | 0.00  | 3,326 (19.2)  | 3,292 (19.0)  | 0.01  |
| Alcohol or drug abuse                             | N (%) | 213 (1.2)     | 236 (1.3)     | -0.01 | 242 (1.2)     | 261 (1.3)     | -0.01 | 215 (1.2)     | 205 (1.2)     | 0.01  |
| Frailty                                           | N (%) | 251 (1.4)     | 259 (1.5)     | 0.00  | 334 (1.6)     | 345 (1.7)     | 0.00  | 251 (1.5)     | 262 (1.5)     | 0.00  |
| <b>Medications</b>                                |       |               |               |       |               |               |       |               |               |       |
| No use of any antidiabetic agent in prior 6-month | N (%) | 2,089 (11.8)  | 2,016 (11.4)  | 0.01  | 1,999 (9.7)   | 1,955 (9.5)   | 0.01  | 2,102 (12.1)  | 2,059 (11.9)  | 0.01  |
| Past use of metformin                             | N (%) | 2,780 (15.7)  | 2,728 (15.4)  | 0.01  | 3,465 (16.9)  | 3,453 (16.8)  | 0.00  | 2,823 (16.3)  | 2,859 (16.5)  | -0.01 |
| Past use of DPP-4i                                | N (%) | 0 (0.0)       | 0 (0.0)       | .     | 2,250 (11.0)  | 2,287 (11.1)  | -0.01 | 1,567 (9.0)   | 1,617 (9.3)   | -0.01 |
| Past use of GLP-1 RA                              | N (%) | 1,040 (5.9)   | 1,039 (5.9)   | 0.00  | 0 (0.0)       | 0 (0.0)       | .     | 1,024 (5.9)   | 1,001 (5.8)   | 0.01  |
| Past use of sulfonylureas                         | N (%) | 1,828 (10.4)  | 1,811 (10.3)  | 0.00  | 2,256 (11.0)  | 2,311 (11.3)  | -0.01 | 0 (0.0)       | 0 (0.0)       | .     |
| Past use of insulin                               | N (%) | 1,524 (8.6)   | 1,510 (8.6)   | 0.00  | 1,808 (8.8)   | 1,826 (8.9)   | 0.00  | 1,616 (9.3)   | 1,628 (9.4)   | 0.00  |
| Past use of glitazones                            | N (%) | 508 (2.9)     | 477 (2.7)     | 0.01  | 623 (3.0)     | 642 (3.1)     | -0.01 | 472 (2.7)     | 473 (2.7)     | 0.00  |
| Past use of meglitinides                          | N (%) | 77 (0.4)      | 72 (0.4)      | 0.00  | 120 (0.6)     | 109 (0.5)     | 0.01  | 91 (0.5)      | 98 (0.6)      | -0.01 |
| Alpha-glucosidase inhibitors                      | N (%) | 79 (0.5)      | 79 (0.5)      | 0.00  | 115 (0.6)     | 110 (0.5)     | 0.00  | 64 (0.4)      | 79 (0.5)      | -0.01 |
| ACE inhibitors                                    | N (%) | 7,488 (42.4)  | 7,486 (42.4)  | 0.00  | 8,815 (42.9)  | 8,850 (43.1)  | 0.00  | 6,934 (40.0)  | 6,879 (39.6)  | 0.01  |
| Angiotensin II receptor blockers                  | N (%) | 4,460 (25.2)  | 4,515 (25.6)  | -0.01 | 5,367 (26.1)  | 5,393 (26.3)  | 0.00  | 4,484 (25.8)  | 4,508 (26.0)  | 0.00  |
| Beta blockers                                     | N (%) | 4,619 (26.1)  | 4,606 (26.1)  | 0.00  | 5,574 (27.1)  | 5,582 (27.2)  | 0.00  | 4,265 (24.6)  | 4,244 (24.5)  | 0.00  |
| Calcium channel blockers                          | N (%) | 3,517 (19.9)  | 3,505 (19.8)  | 0.00  | 4,198 (20.4)  | 4,178 (20.3)  | 0.00  | 3,273 (18.9)  | 3,266 (18.8)  | 0.00  |
| Thiazides                                         | N (%) | 4,964 (28.1)  | 5,031 (28.5)  | -0.01 | 5,966 (29.1)  | 5,936 (28.9)  | 0.00  | 4,629 (26.7)  | 4,593 (26.5)  | 0.00  |
| Loop diuretics                                    | N (%) | 1,427 (8.1)   | 1,450 (8.2)   | 0.00  | 1,742 (8.5)   | 1,764 (8.6)   | 0.00  | 1,257 (7.2)   | 1,248 (7.2)   | 0.00  |
| Other diuretics <sup>1</sup>                      | N (%) | 762 (4.3)     | 784 (4.4)     | -0.01 | 918 (4.5)     | 944 (4.6)     | -0.01 | 717 (4.1)     | 720 (4.2)     | 0.00  |
| Nitrates                                          | N (%) | 528 (3.0)     | 541 (3.1)     | 0.00  | 645 (3.1)     | 677 (3.3)     | -0.01 | 470 (2.7)     | 469 (2.7)     | 0.00  |
| Other antihypertensives                           | N (%) | 719 (4.1)     | 734 (4.2)     | 0.00  | 880 (4.3)     | 887 (4.3)     | 0.00  | 617 (3.6)     | 609 (3.5)     | 0.00  |
| Digoxin                                           | N (%) | 156 (0.9)     | 185 (1.1)     | -0.02 | 195 (1.0)     | 199 (1.0)     | 0.00  | 130 (0.8)     | 118 (0.7)     | 0.01  |
| Antiarrhythmics                                   | N (%) | 122 (0.7)     | 116 (0.7)     | 0.00  | 141 (0.7)     | 134 (0.7)     | 0.00  | 111 (0.6)     | 109 (0.6)     | 0.00  |
| COPD or asthma medications                        | N (%) | 2,120 (12.0)  | 2,145 (12.1)  | 0.00  | 2,542 (12.4)  | 2,535 (12.3)  | 0.00  | 2,096 (12.1)  | 2,056 (11.9)  | 0.01  |
| Statins                                           | N (%) | 10,634 (60.2) | 10,650 (60.3) | 0.00  | 12,659 (61.6) | 12,707 (61.9) | 0.00  | 10,441 (60.2) | 10,309 (59.4) | 0.02  |
| Other lipid-lowering drugs                        | N (%) | 2,266 (12.8)  | 2,251 (12.7)  | 0.00  | 2,745 (13.4)  | 2,726 (13.3)  | 0.00  | 2,224 (12.8)  | 2,191 (12.6)  | 0.01  |
| Anticoagulants                                    | N (%) | 600 (3.4)     | 611 (3.5)     | 0.00  | 701 (3.4)     | 707 (3.4)     | 0.00  | 557 (3.2)     | 552 (3.2)     | 0.00  |
| Antiplatelets                                     | N (%) | 1,093 (6.2)   | 1,075 (6.1)   | 0.00  | 1,320 (6.4)   | 1,380 (6.7)   | -0.01 | 988 (5.7)     | 1,001 (5.8)   | 0.00  |
| Nonsteroidal anti-inflammatory drugs              | N (%) | 3,245 (18.4)  | 3,177 (18.0)  | 0.01  | 3,874 (18.9)  | 3,854 (18.8)  | 0.00  | 3,180 (18.3)  | 3,162 (18.2)  | 0.00  |
| Opioids                                           | N (%) | 4,885 (27.7)  | 4,887 (27.7)  | 0.00  | 5,827 (28.4)  | 5,917 (28.8)  | -0.01 | 4,690 (27.0)  | 4,671 (26.9)  | 0.00  |
| Oral steroids                                     | N (%) | 2,644 (15.0)  | 2,655 (15.0)  | 0.00  | 3,088 (15.0)  | 3,049 (14.8)  | 0.01  | 2,627 (15.1)  | 2,529 (14.6)  | 0.02  |

|                                              |           |              |              |       |              |              |       |              |              |       |
|----------------------------------------------|-----------|--------------|--------------|-------|--------------|--------------|-------|--------------|--------------|-------|
| Antidepressants                              | N (%)     | 4,237 (24.0) | 4,167 (23.6) | 0.01  | 5,167 (25.2) | 5,169 (25.2) | 0.00  | 4,227 (24.4) | 4,138 (23.8) | 0.01  |
| Anticonvulsants                              | N (%)     | 2,435 (13.8) | 2,406 (13.6) | 0.00  | 2,950 (14.4) | 2,972 (14.5) | 0.00  | 2,338 (13.5) | 2,311 (13.3) | 0.00  |
| Other psychotropic medications               | N (%)     | 3,062 (17.3) | 3,026 (17.1) | 0.01  | 3,640 (17.7) | 3,642 (17.7) | 0.00  | 3,036 (17.5) | 2,934 (16.9) | 0.02  |
| <b>Measures of healthcare utilization</b>    |           |              |              |       |              |              |       |              |              |       |
| Any hospitalization within prior 30 days     | N (%)     | 197 (1.1)    | 181 (1.0)    | 0.01  | 215 (1.1)    | 215 (1.1)    | 0.00  | 175 (1.0)    | 170 (1.0)    | 0.00  |
| Any hospitalization during prior 31-183 days | N (%)     | 696 (3.9)    | 715 (4.1)    | -0.01 | 800 (3.9)    | 845 (4.1)    | -0.01 | 631 (3.6)    | 646 (3.7)    | 0.00  |
| N hospital days                              | Mean (SD) | 0.2 (1.6)    | 0.3 (2.1)    | -0.03 | 0.2 (1.4)    | 0.2 (1.5)    | 0.00  | 0.2 (1.6)    | 0.3 (2.6)    | -0.03 |
| Number of emergency department visits        | Mean (SD) | 0.2 (0.7)    | 0.2 (0.7)    | -0.01 | 0.2 (0.7)    | 0.2 (0.7)    | -0.02 | 0.2 (0.7)    | 0.2 (0.7)    | -0.01 |
| Number of any physician visits               | Mean (SD) | 4.4 (3.4)    | 4.4 (3.4)    | 0.00  | 4.6 (3.5)    | 4.6 (3.5)    | -0.01 | 4.4 (3.4)    | 4.4 (3.4)    | 0.01  |
| Visit to endocrinologist                     | N (%)     | 1,968 (11.1) | 2,065 (11.7) | -0.02 | 2,822 (13.7) | 2,859 (13.9) | -0.01 | 2,299 (13.3) | 2,292 (13.2) | 0.00  |
| Visit to cardiologist                        | N (%)     | 1,355 (7.7)  | 1,392 (7.9)  | -0.01 | 1,631 (7.9)  | 1,659 (8.1)  | -0.01 | 1,366 (7.9)  | 1,455 (8.4)  | -0.02 |
| Number of electrocardiograms received        | Mean (SD) | 0.3 (0.7)    | 0.3 (0.8)    | -0.01 | 0.3 (0.7)    | 0.3 (0.8)    | -0.01 | 0.3 (0.7)    | 0.3 (0.8)    | -0.01 |
| Number of distinct prescriptions             | Mean (SD) | 9.6 (5.2)    | 9.6 (5.2)    | 0.01  | 10.1 (5.2)   | 10.2 (5.2)   | -0.03 | 9.5 (5.3)    | 9.4 (5.0)    | 0.03  |
| Number of preventive services received       | Mean (SD) | 0.6 (0.8)    | 0.6 (0.8)    | 0.00  | 0.6 (0.8)    | 0.6 (0.8)    | 0.01  | 0.6 (0.8)    | 0.6 (0.8)    | 0.01  |
| Number of hemoglobin of HbA1c tests ordered  | Mean (SD) | 1.3 (0.8)    | 1.3 (0.8)    | -0.01 | 1.3 (0.9)    | 1.3 (0.9)    | -0.01 | 1.3 (0.8)    | 1.3 (0.8)    | 0.00  |
| Number of creatinine tests ordered           | Mean (SD) | 0.0 (0.2)    | 0.0 (0.2)    | 0.00  | 0.0 (0.2)    | 0.0 (0.2)    | 0.00  | 0.0 (0.2)    | 0.0 (0.2)    | 0.00  |
| Number of BUN tests ordered                  | Mean (SD) | 1.0 (1.0)    | 1.0 (1.1)    | -0.03 | 1.0 (1.0)    | 1.0 (1.1)    | -0.02 | 1.0 (1.0)    | 1.0 (1.1)    | 0.00  |
| Number of lipid tests ordered                | Mean (SD) | 0.9 (0.8)    | 0.9 (0.8)    | 0.00  | 0.9 (0.8)    | 0.9 (0.8)    | 0.00  | 1.0 (0.8)    | 1.0 (0.8)    | 0.00  |
| <b>Laboratory tests</b>                      |           |              |              |       |              |              |       |              |              |       |
| Patients with HbA1c available                | N (%)     | 6,591 (37.3) | 6,806 (38.5) | -0.02 | 7,727 (37.6) | 7,338 (35.7) | 0.04  | 6,436 (37.1) | 6,557 (37.8) | -0.01 |
| HbA1c, %                                     | Mean (SD) | 8.8 (1.9)    | 8.8 (1.9)    | 0.02  | 8.8 (1.8)    | 8.8 (1.9)    | 0.02  | 8.7 (1.9)    | 8.9 (2.0)    | -0.10 |
| Patients with creatinine available           | N (%)     | 7,023 (39.8) | 7,198 (40.7) | -0.02 | 8,217 (40.0) | 7,909 (38.5) | 0.03  | 6,959 (40.1) | 6,906 (39.8) | 0.01  |
| Creatinine, mg/dL                            | Mean (SD) | 0.9 (0.2)    | 1.0 (0.3)    | -0.16 | 0.9 (0.2)    | 1.0 (0.3)    | -0.16 | 0.9 (0.2)    | 1.0 (0.3)    | -0.11 |
| Patients with eGFR available                 | N (%)     | 7,023 (39.8) | 7,198 (40.7) | -0.02 | 8,217 (40.0) | 7,909 (38.5) | 0.03  | 6,959 (40.1) | 6,906 (39.8) | 0.01  |
| eGFR, mL/min/1.73m <sup>2</sup>              | Mean (SD) | 100.4 (18.3) | 97.8 (22.2)  | 0.13  | 99.3 (18.7)  | 97.4 (21.5)  | 0.09  | 100.9 (18.1) | 98.8 (21.3)  | -0.11 |
| Patients with BUN available                  | N (%)     | 6,941 (39.3) | 7,101 (40.2) | -0.02 | 8,106 (39.5) | 7,814 (38.0) | 0.03  | 6,885 (39.7) | 6,839 (39.4) | 0.01  |
| BUN, mg/dL                                   | Mean (SD) | 15.7 (5.7)   | 16.2 (7.2)   | -0.07 | 15.9 (5.9)   | 16.4 (6.6)   | -0.08 | 15.6 (5.6)   | 15.9 (6.5)   | -0.05 |
| Patients with LDL available                  | N (%)     | 5,645 (32.0) | 5,789 (32.8) | -0.02 | 6,605 (32.2) | 6,317 (30.8) | 0.03  | 5,568 (32.1) | 5,634 (32.5) | -0.01 |
| LDL, mg/dL                                   | Mean (SD) | 95.0 (36.9)  | 97.0 (36.4)  | -0.06 | 94.4 (36.0)  | 94.5 (36.0)  | 0.00  | 94.2 (36.2)  | 97.6 (37.0)  | -0.09 |

DPP-4i: DPP-4 inhibitors; GLP-1 RA: GLP-1 receptor agonists; PS: propensity score; St. Diff: Standardized difference; SD: standard deviation; TIA: transient ischemic attack; COPD: Chronic Obstructive Pulmonary Disease; ACE: angiotensin converting enzyme; HbA1c: Hemoglobin A1c; BUN: blood urea nitrogen; eGFR: estimated glomerular filtration rate; LDL: low-density lipoprotein

<sup>1</sup> Other diuretics included eplerenone, spironolactone, amiloride, and triamterene
